# Supplementary material
Source: PubMed Central journal article supplement (PMC3748135)
Supplement: NIHMS379118-supplement-Supporting_Information.pdf [file NIHMS379118-supplement-Supporting_Information.pdf]

**CHEMISTRY**   
**A EUROPEAN JOURNAL**

Supporting Information

© Copyright Wiley-VCH Verlag GmbH & Co. KGaA, 69451 Weinheim, 2009

Step-wise Conversion of Two Pyrrole Moieties of Octaethylporphyrin to  
Pyridin-3-ones: Synthesis, Mass Spectral and Photophysical Properties  
of Mono- and Bis(oxypyri)porphyrins

*Claudia Ryppa, Dariusz Niedzwiedzki, Nicole L. Morozowich, Rapole Srikanth, Matthias Zeller,  
Harry A. Frank, and Christian Brückner\**

University of Connecticut, Department of Chemistry, Unit 3060, Storrs, CT 06269-3060, U.S.A.

**Contents:**

|                                                                                           |   |
|-------------------------------------------------------------------------------------------|---|
| <b>Figure S1.</b> $^1\text{H}$ NMR ( $\text{CHCl}_3$ , 400 MHz) of <b>10</b> . .....      | 3 |
| <b>Figure S2.</b> $^{13}\text{C}$ NMR ( $\text{CHCl}_3$ , 100 MHz) of <b>10</b> . .....   | 3 |
| <b>Figure S3.</b> $^1\text{H}$ NMR ( $\text{CHCl}_3$ , 400 MHz) of <b>12</b> . .....      | 4 |
| <b>Figure S4.</b> $^{13}\text{C}$ NMR ( $\text{CHCl}_3$ , 100 MHz) of <b>12</b> . .....   | 4 |
| <b>Figure S5.</b> $^1\text{H}$ NMR ( $\text{CHCl}_3$ , 400 MHz) of <b>12Zn</b> . .....    | 5 |
| <b>Figure S6.</b> $^{13}\text{C}$ NMR ( $\text{CHCl}_3$ , 100 MHz) of <b>12Zn</b> . ..... | 5 |
| <b>Figure S7.</b> $^1\text{H}$ NMR ( $\text{CHCl}_3$ , 400 MHz) of <b>14</b> . .....      | 6 |
| <b>Figure S8.</b> $^{13}\text{C}$ NMR ( $\text{CHCl}_3$ , 100 MHz) of <b>14</b> . .....   | 6 |
| <b>Figure S9.</b> $^1\text{H}$ NMR ( $\text{CHCl}_3$ , 500 MHz) of <b>15</b> . .....      | 7 |
| <b>Figure S10.</b> $^{13}\text{C}$ NMR ( $\text{CHCl}_3$ , 125 MHz) of <b>15</b> . .....  | 7 |
| <b>Figure S11.</b> $^1\text{H}$ NMR ( $\text{CHCl}_3$ , 500 MHz) of <b>16a</b> . .....    | 8 |
| <b>Figure S12.</b> $^{13}\text{C}$ NMR ( $\text{CHCl}_3$ , 125 MHz) of <b>16a</b> . ..... | 8 |

|                                                                                                                                                                                                                                                                                                                                               |    |
|-----------------------------------------------------------------------------------------------------------------------------------------------------------------------------------------------------------------------------------------------------------------------------------------------------------------------------------------------|----|
| <b>Figure S13.</b> $^1\text{H}$ NMR ( $\text{CHCl}_3$ , 500 MHz) of <b>16b</b> .                                                                                                                                                                                                                                                              | 9  |
| <b>Figure S14.</b> $^{13}\text{C}$ NMR ( $\text{CHCl}_3$ , 125 MHz) of <b>16b</b> .                                                                                                                                                                                                                                                           | 9  |
| <b>Figure S15.</b> Summary of the HQMC and NOESY correlation data (all $\text{CHCl}_3$ , 500/125 MHz).                                                                                                                                                                                                                                        | 10 |
| <b>Figure S16:</b> Normalized absorption and fluorescence emission spectra and triplet life-times of <b>5</b> , <b>12</b> , <b>18</b> , <b>10</b> , <b>15</b> , <b>17</b> , <b>16a</b> , and <b>16b</b> , together with their transient triplet-triplet transient spectra and the kinetic traces used for the triplet lifetime determination. | 12 |
| <b>Figure S17:</b> UV-vis Spectrophotometric titration of OEP ( <b>5</b> ) (Q-band region).                                                                                                                                                                                                                                                   | 14 |
| <b>Figure S18:</b> UV-vis Spectrophotometric titration of oxochlorin <b>18</b> (Q-band region).                                                                                                                                                                                                                                               | 14 |
| <b>Figure S19:</b> UV-vis Spectrophotometric titration of diol chlorin <b>10</b> (Q-band region).                                                                                                                                                                                                                                             | 15 |
| <b>Figure S21:</b> UV-vis Spectrophotometric titration of <b>15</b> (Q-band region).                                                                                                                                                                                                                                                          | 15 |
| <b>Figure S20:</b> UV-vis Spectrophotometric titration of oxypyriporphyrin <b>12</b> (Q-band region).                                                                                                                                                                                                                                         | 16 |
| <b>Figure S22:</b> $^1\text{H}$ NMR of <b>12</b> ( $\text{CDCl}_3$ + traces TFA, 400 MHz).                                                                                                                                                                                                                                                    | 16 |
| <b>Figure S22:</b> UV-vis Spectrophotometric titration of <b>16a</b> (Q-band region).                                                                                                                                                                                                                                                         | 17 |
| <b>Figure S23:</b> UV-vis Spectrophotometric titration of <b>16b</b> (Q-band region).                                                                                                                                                                                                                                                         | 17 |
| <b>Figure S24:</b> FT-IR Spectra (diffuse reflectance, neat sample) of <b>10</b> (for comparison).                                                                                                                                                                                                                                            | 18 |
| <b>Figure S25:</b> FT-IR Spectra (diffuse reflectance, neat sample) of <b>12</b> .                                                                                                                                                                                                                                                            | 18 |
| <b>Figure S26:</b> FT-IR Spectra (diffuse reflectance, neat sample) of <b>12Zn</b> .                                                                                                                                                                                                                                                          | 19 |
| <b>Figure S27:</b> FT-IR Spectra (diffuse reflectance, neat sample) of <b>15</b> .                                                                                                                                                                                                                                                            | 19 |
| <b>Figure S28:</b> FT-IR Spectra (diffuse reflectance, neat sample) of <b>16a</b> .                                                                                                                                                                                                                                                           | 20 |
| <b>Figure S29:</b> FT-IR Spectra (diffuse reflectance, neat sample) of <b>16b</b> .                                                                                                                                                                                                                                                           | 20 |
| <b>Figure S30:</b> ORTEP (30% occupancy) representation of the structure of <b>12</b> .                                                                                                                                                                                                                                                       | 21 |
| <b>Figure S31:</b> Packing diagram for <b>12</b> .                                                                                                                                                                                                                                                                                            | 21 |
| <b>Tabel S1.</b> Solvent-dependent UV-vis spectra of <b>12</b> .                                                                                                                                                                                                                                                                              | 11 |
| <b>Tabel S2.</b> Solvent-dependent UV-vis spectra of <b>12Zn</b> .                                                                                                                                                                                                                                                                            | 11 |
| <b>Tabel S3.</b> Solvent-dependent UV-vis spectra of <b>15</b> .                                                                                                                                                                                                                                                                              | 11 |
| <b>Table S4.</b> Triplet Relaxation Times ( $\tau$ ) in toluene and 2-MeTHF.                                                                                                                                                                                                                                                                  | 13 |



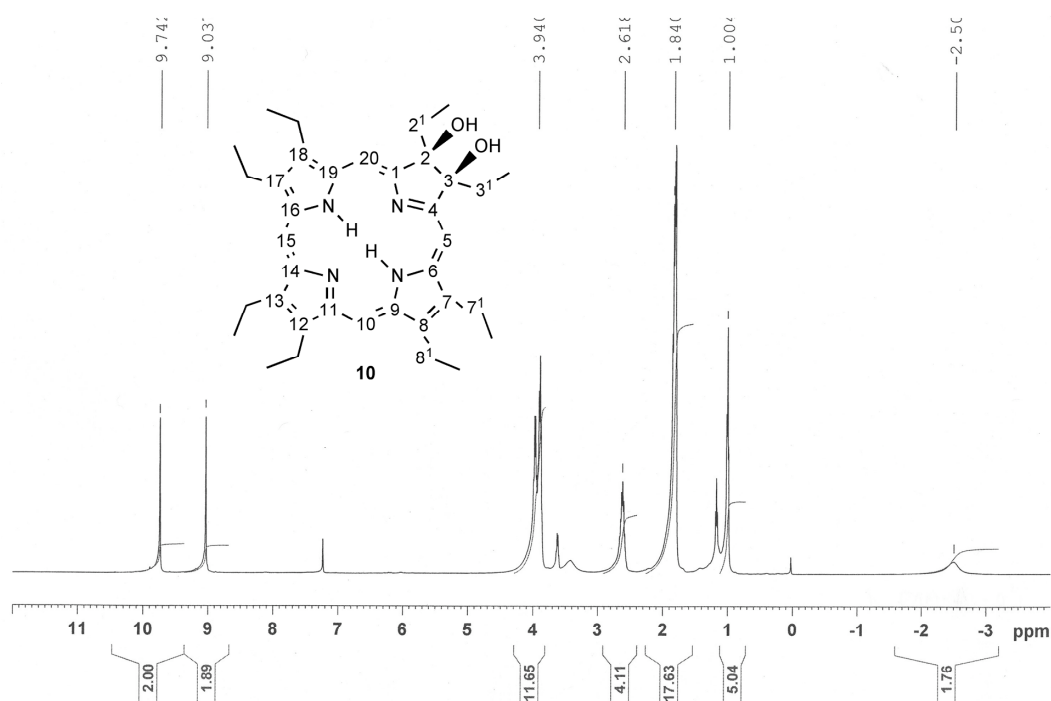

**Figure S1.**  $^1\text{H}$  NMR ( $\text{CHCl}_3$ , 400 MHz) of **10**.

Known compound (C. G. Chang, C. Sotiriou, *J. Org. Chem.* **1987**, 52, 926, included for comparison.):  $\delta = 9.74$  (s, 2H, 10,15-H), 9.03 (s, 2H, 5,20-H), 4.01-3.98 (m, 12H, 7<sup>1</sup>,8<sup>1</sup>,12<sup>1</sup>,13<sup>1</sup>,17<sup>1</sup>,18<sup>1</sup>-CH<sub>2</sub>), 2.62 (m, 4H, 2<sup>1</sup>,3<sup>1</sup>-CH<sub>2</sub>), 1.9-1.8 (m, 18 H, 7<sup>1</sup>,8<sup>1</sup>,12<sup>1</sup>,13<sup>1</sup>,17<sup>1</sup>,18<sup>1</sup>-CH<sub>3</sub>), 1.00 (m, 6H, 2<sup>1</sup>,3<sup>1</sup>-CH<sub>3</sub>), -2.5 (br s, 2H, NH; exchangeable with D<sub>2</sub>O). The assignments of the proton signals in **10** are commensurate with those made by Tamiaki (H. Tamiaki, S. Kimura, T. Kimura, *Tetrahedron*, **2003**, 59, 7423.).

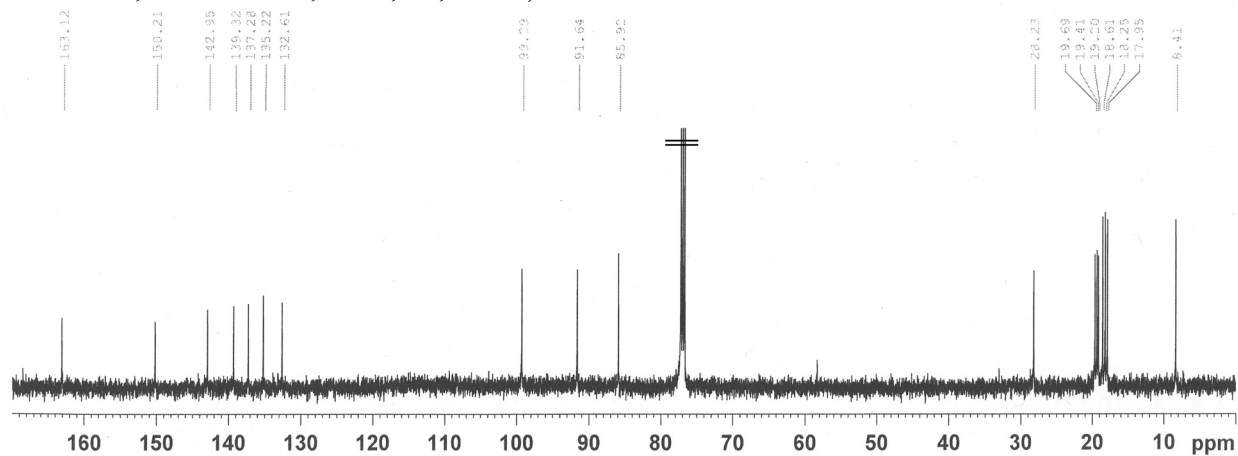

**Figure S2.**  $^{13}\text{C}$  NMR ( $\text{CHCl}_3$ , 100 MHz) of **10**.

Known compound (C. G. Chang, C. Sotiriou, *J. Org. Chem.* **1987**, 52, 926, included for comparison.), included for comparison:  $\delta = 163.1$  (1,4-C), 150.2 (9,16-C), 143.0 (8,17-C), 139.3 (12,13-C), 137.3 (6,19-C), 135.2 (7,18-C), 132.6 (11,14-C), 99.3 (10,15-CH), 91.6 (5,20-CH), 85.9 (2,3-C), 28.2 (2<sup>1</sup>,3<sup>1</sup>-CH<sub>2</sub>), 19.7, 19.4, 19.2 (7<sup>1</sup>,8<sup>1</sup>,12<sup>1</sup>,13<sup>1</sup>,17<sup>1</sup>,18<sup>1</sup>-CH<sub>2</sub>), 18.6, 18.3, 18.0 (7<sup>1</sup>,8<sup>1</sup>,12<sup>1</sup>,13<sup>1</sup>,17<sup>1</sup>,18<sup>1</sup>-CH<sub>3</sub>), 8.4 (2<sup>1</sup>,3<sup>1</sup>-CH<sub>3</sub>), (assignments based on HMBC, and HMQC spectra).

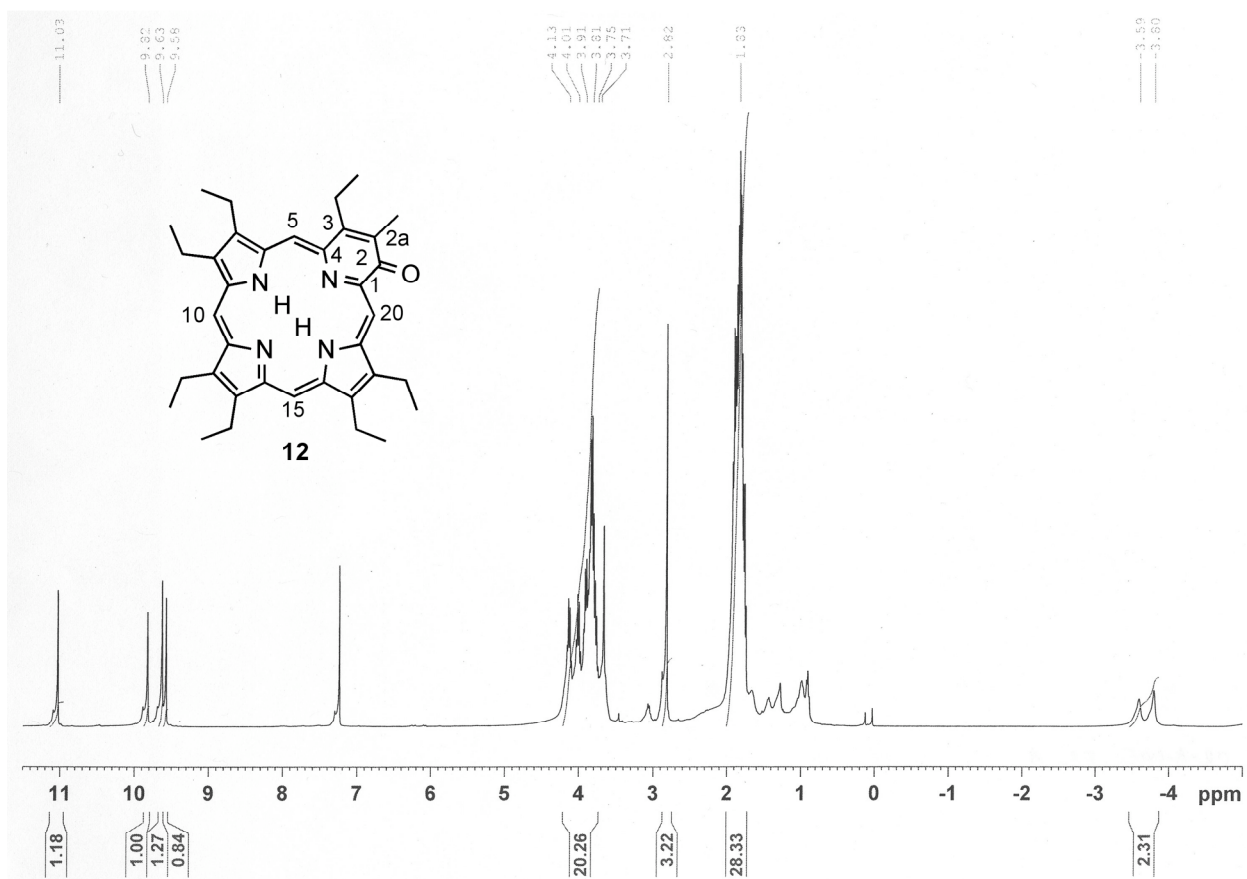

**Figure S3.  $^1\text{H}$  NMR ( $\text{CHCl}_3$ , 400 MHz) of **12**.**

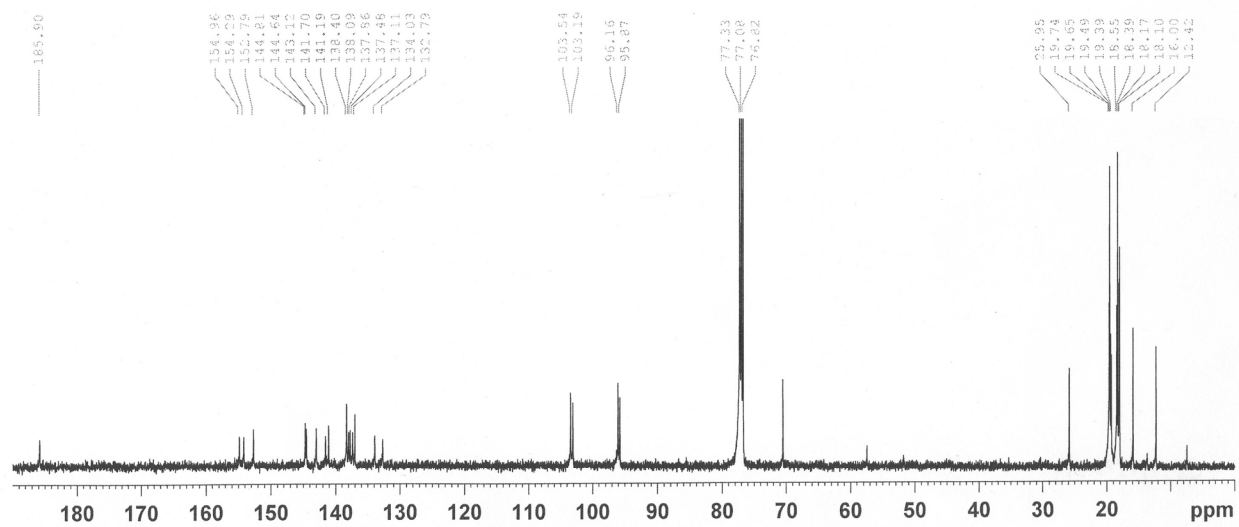

**Figure S4.  $^{13}\text{C}$  NMR ( $\text{CHCl}_3$ , 100 MHz) of **12**.**

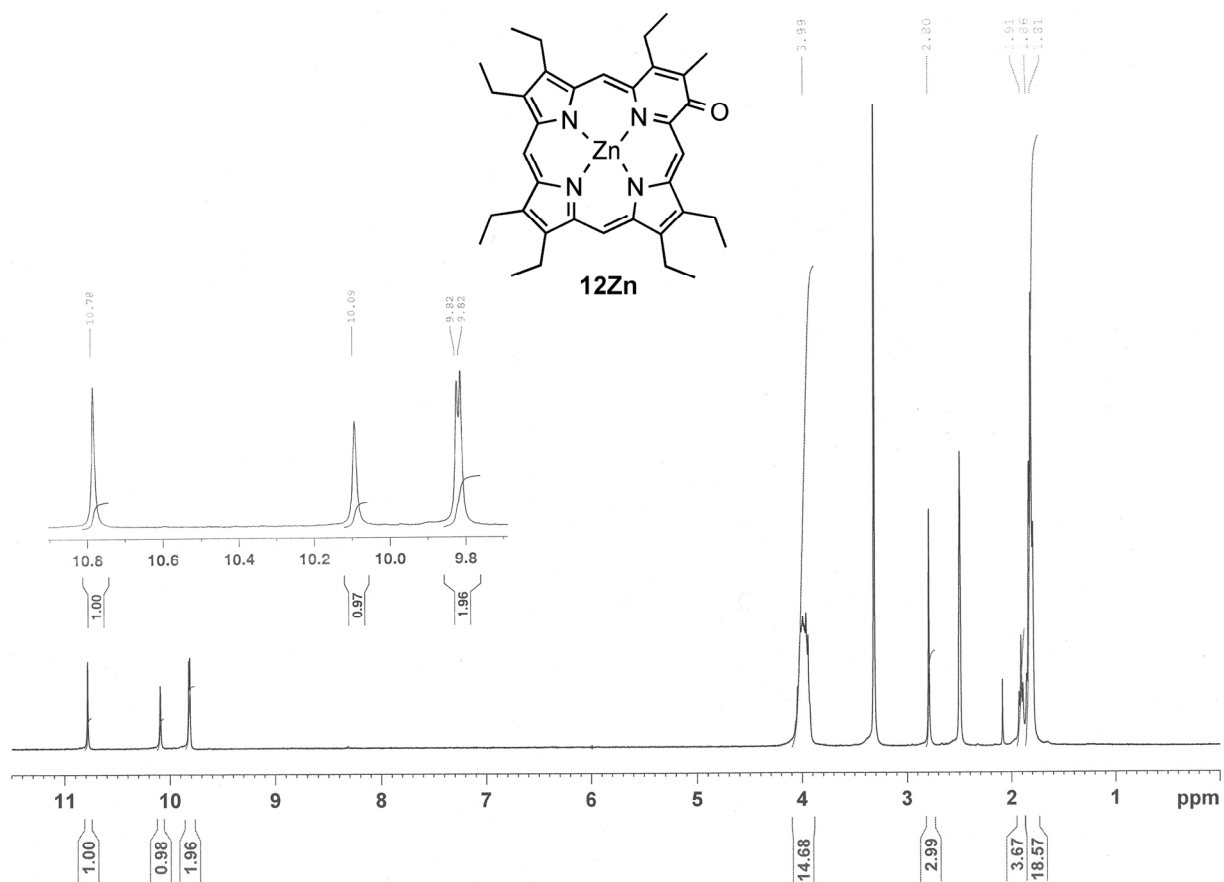

**Figure S5.** <sup>1</sup>H NMR (CHCl<sub>3</sub>, 400 MHz) of **12Zn**.

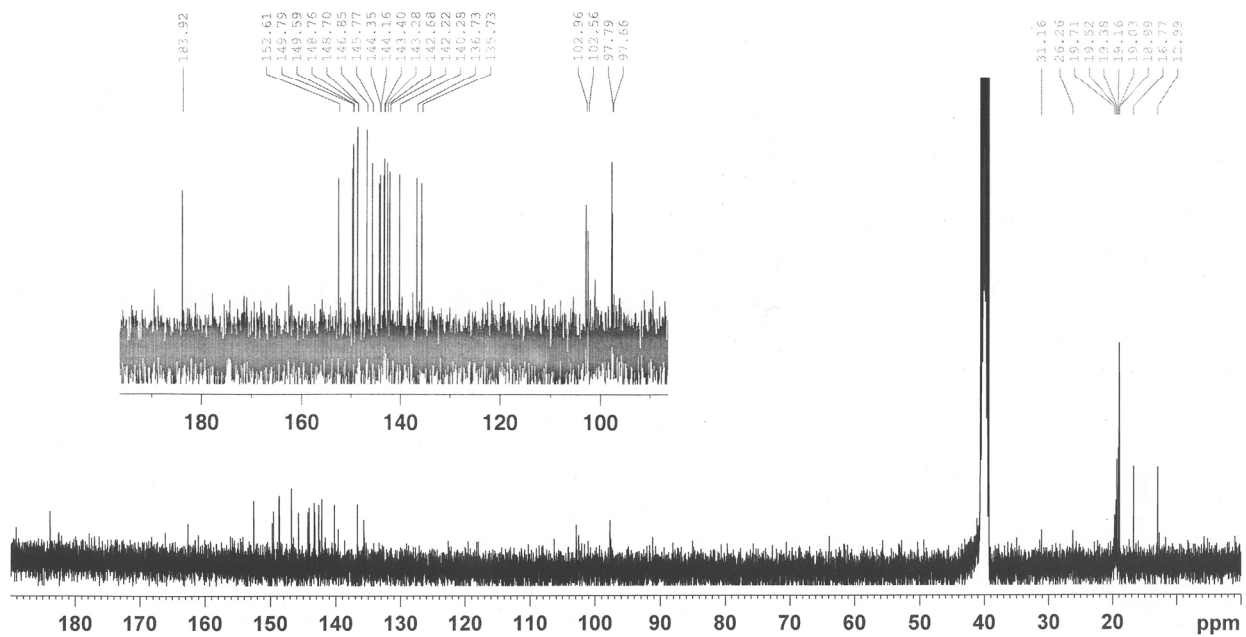

**Figure S6.** <sup>13</sup>C NMR (CHCl<sub>3</sub>, 100 MHz) of **12Zn**.

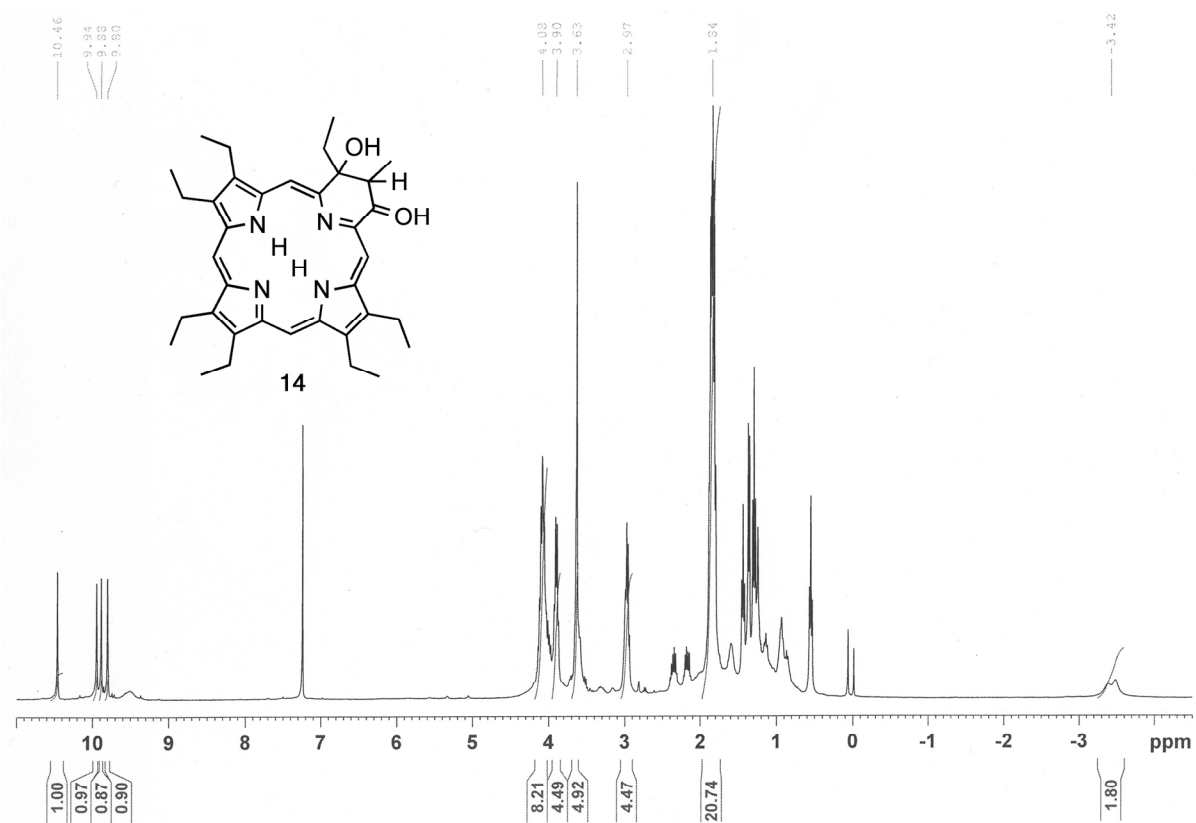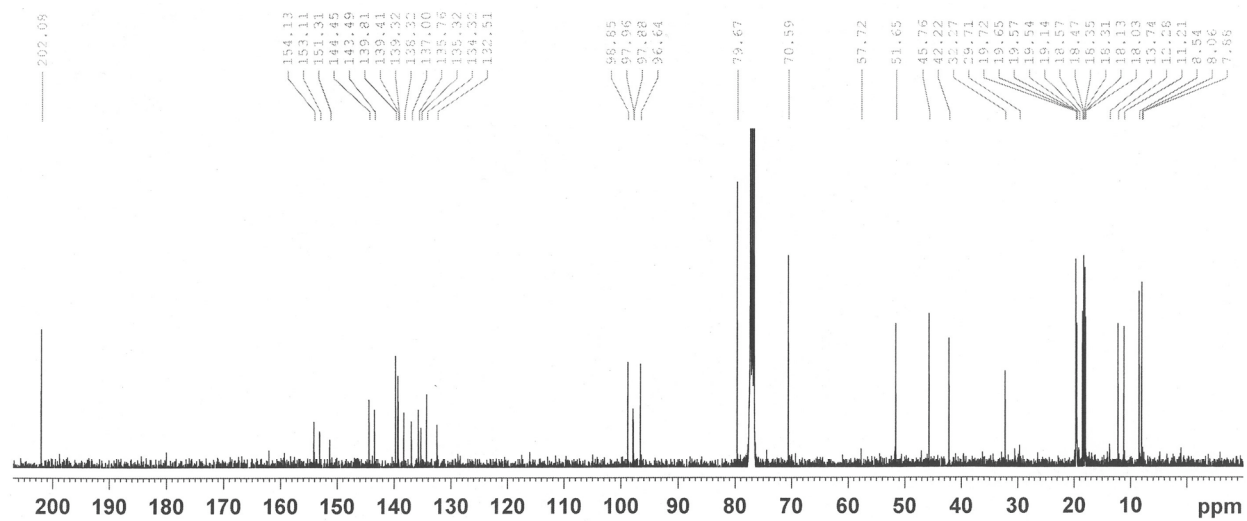

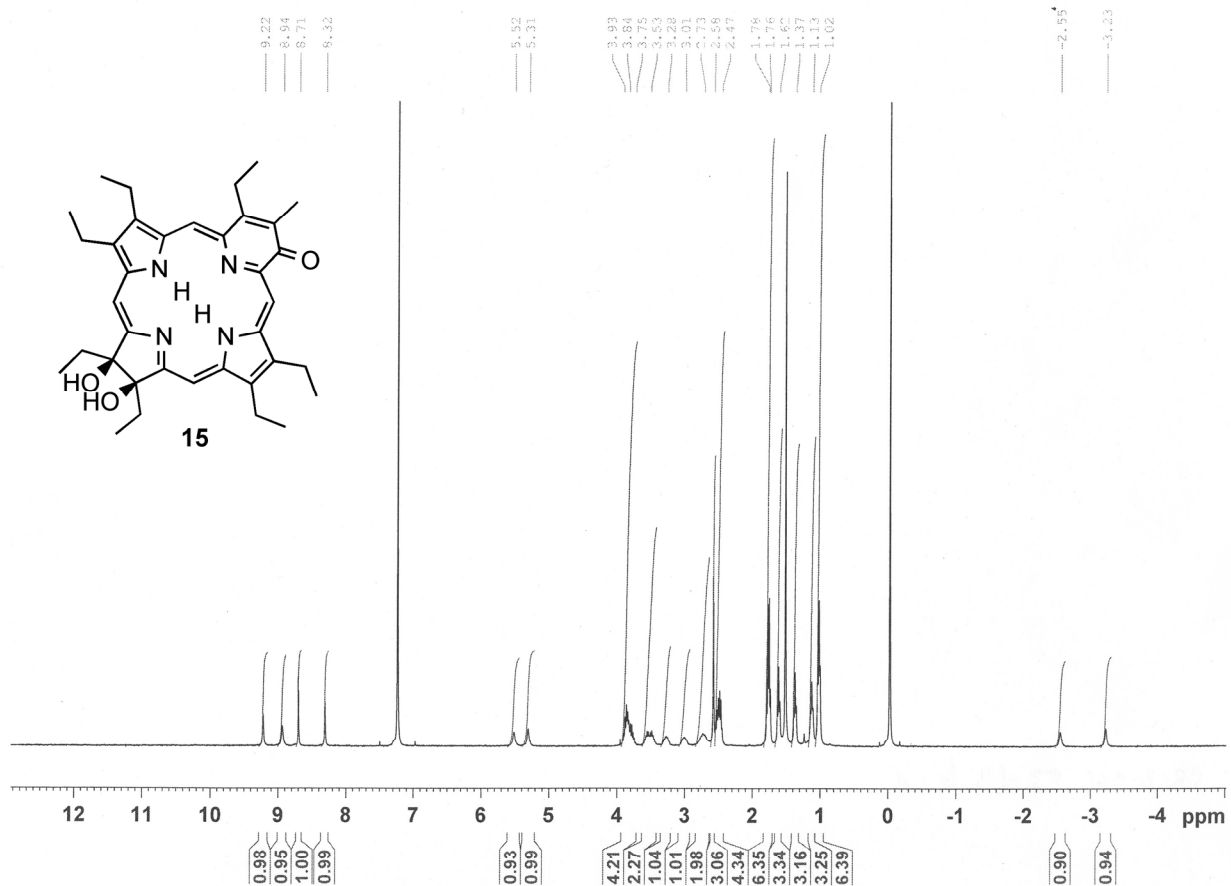

**Figure S9.**  $^1\text{H}$  NMR ( $\text{CHCl}_3$ , 500 MHz) of **15**.

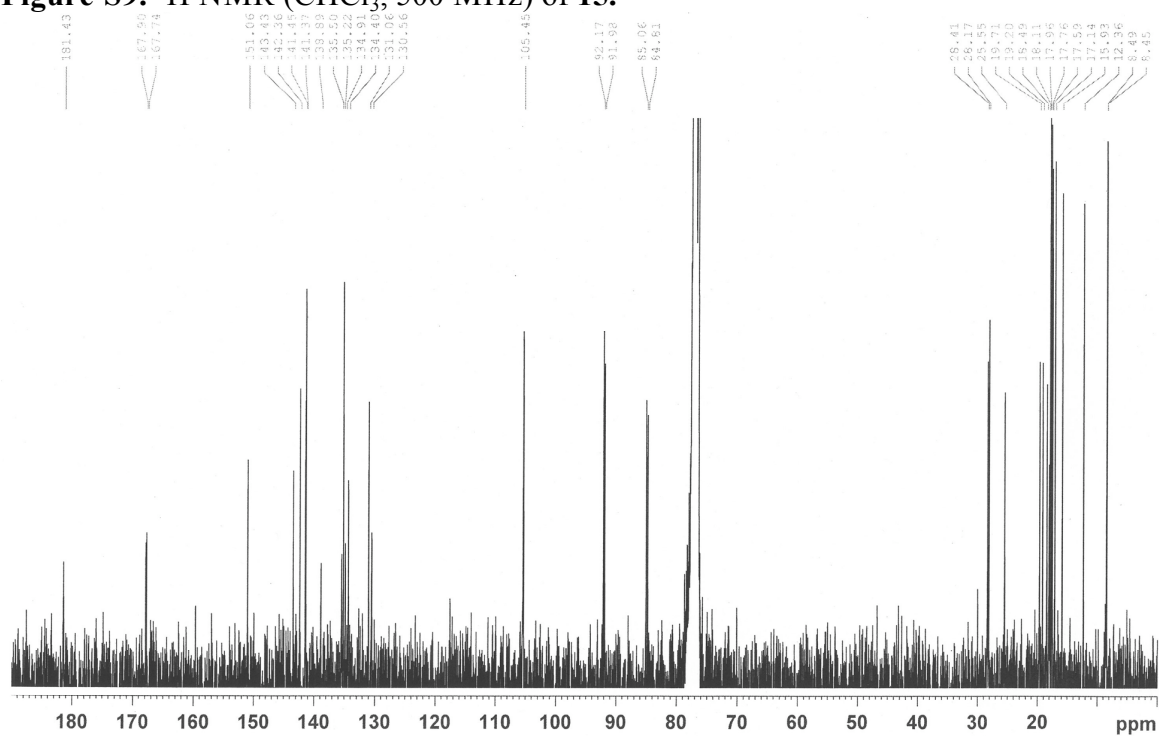

**Figure S10.**  $^{13}\text{C}$  NMR ( $\text{CHCl}_3$ , 125 MHz) of **15**.

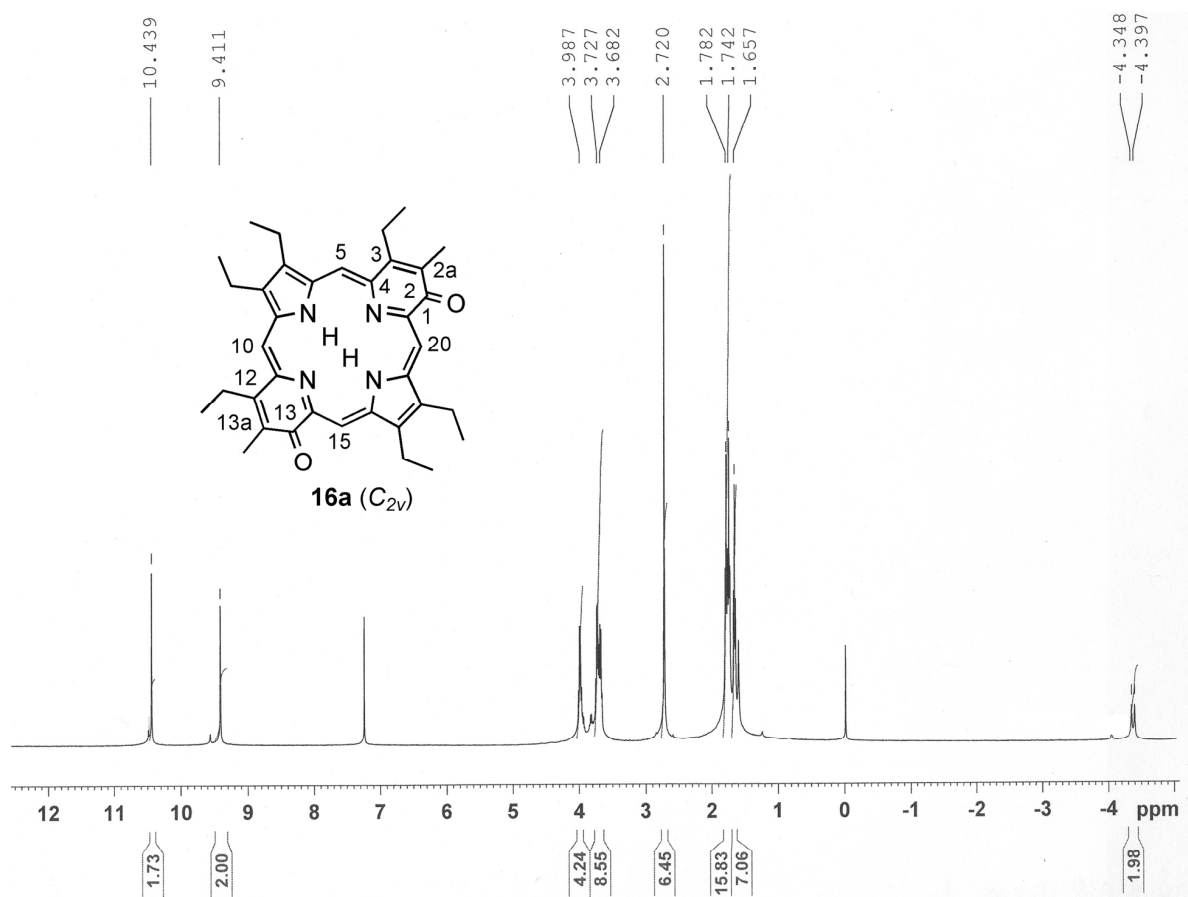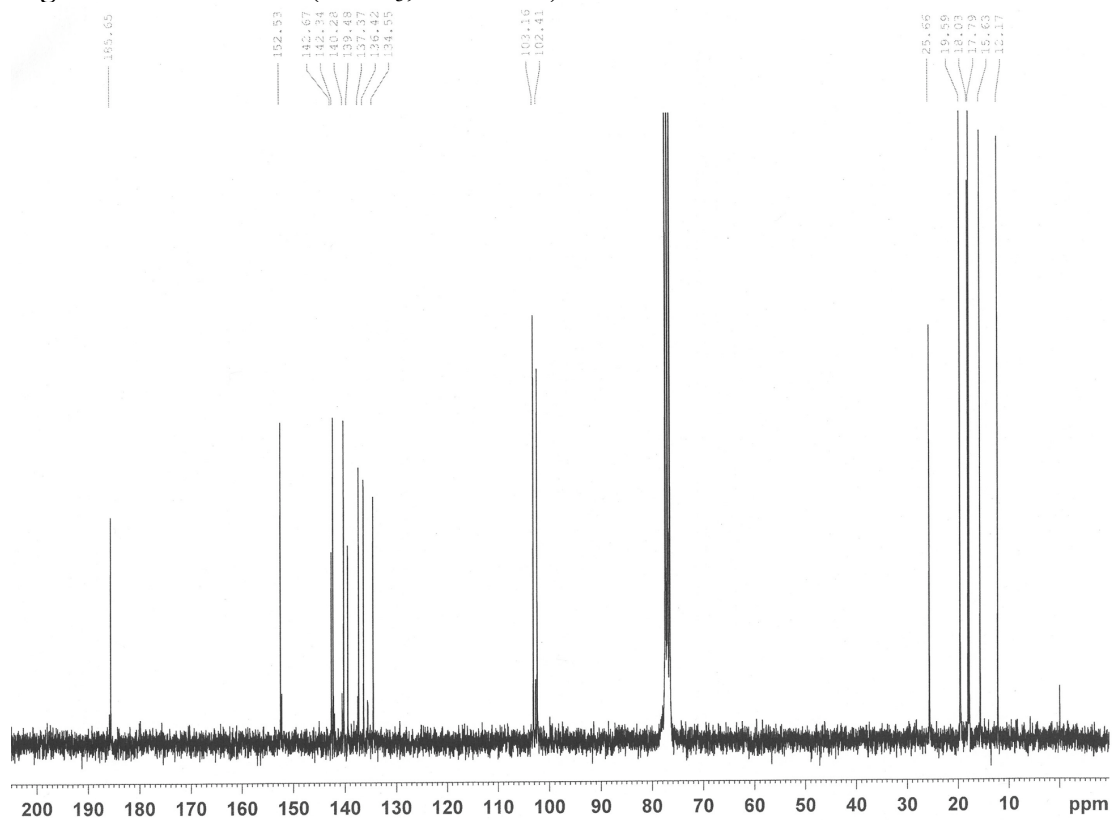



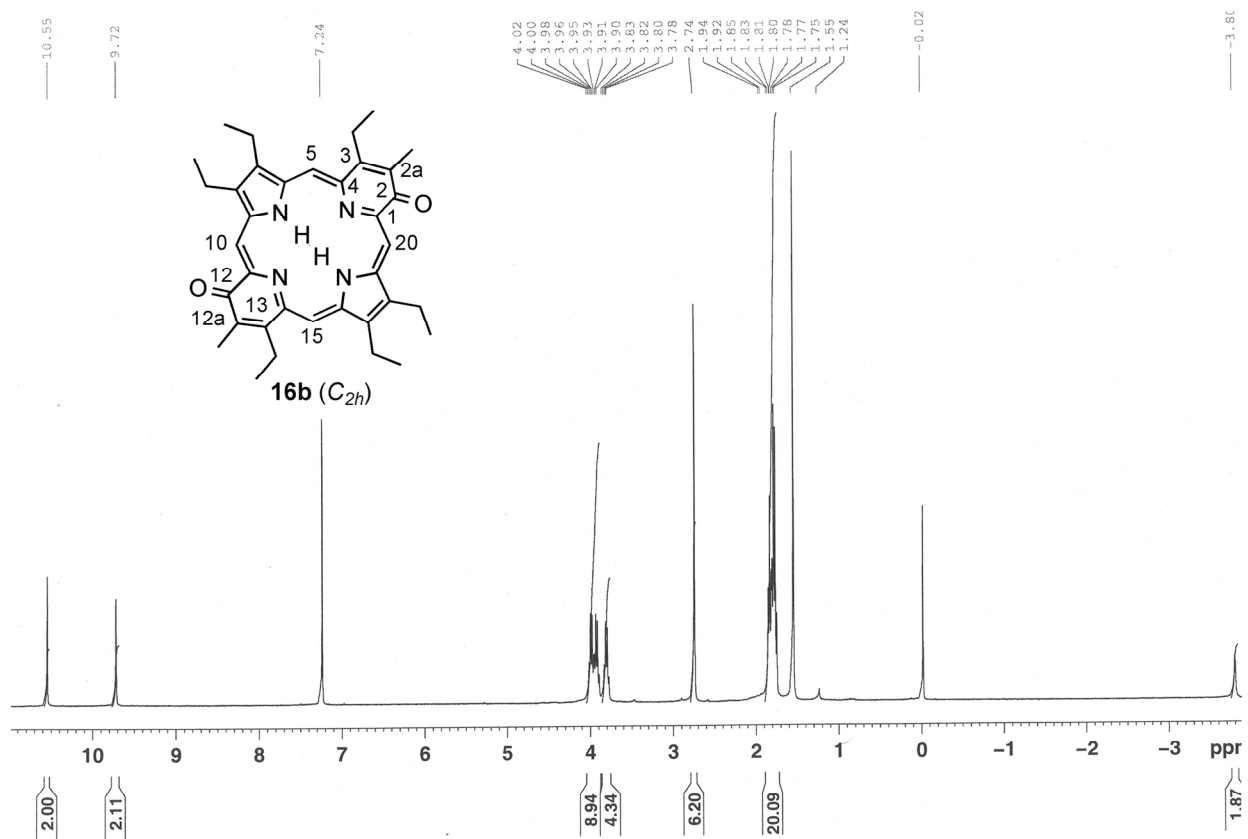

**Figure S13.**  $^1H$  NMR (CHCl<sub>3</sub>, 500 MHz) of **16b**.

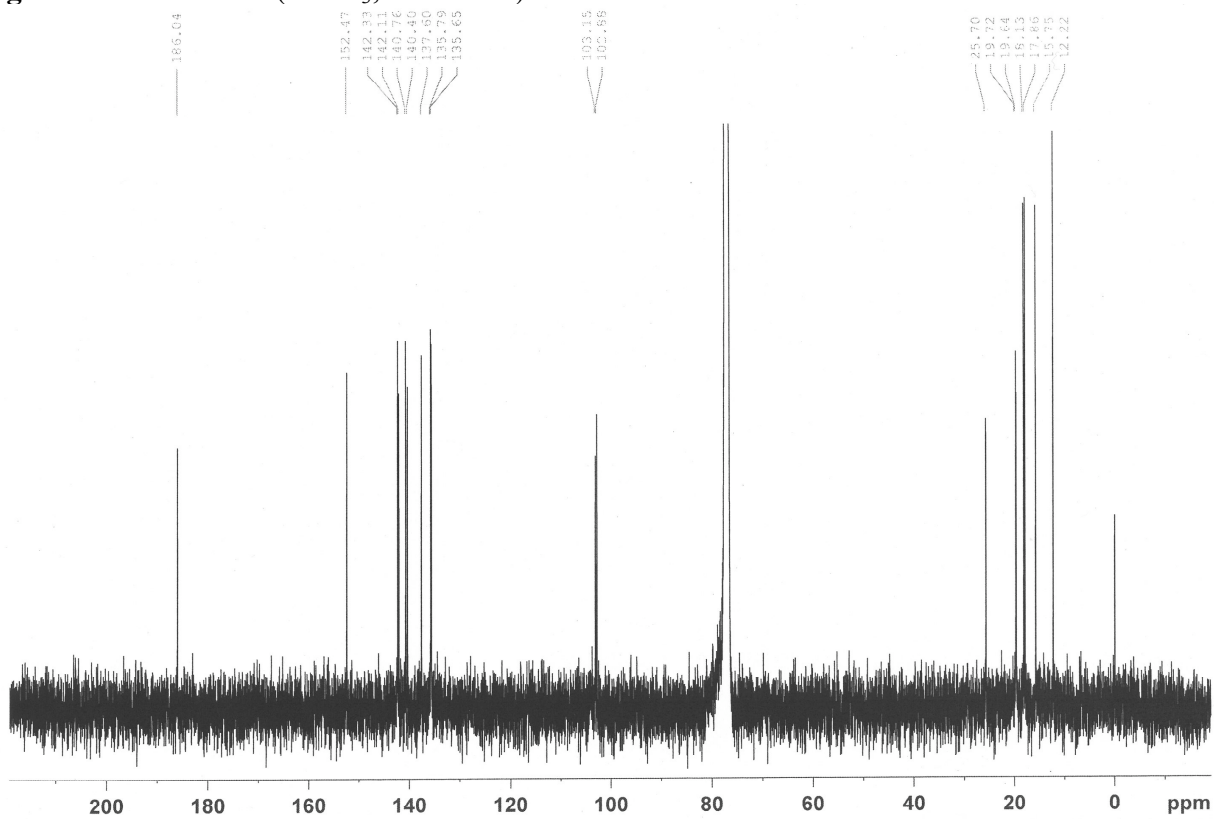

**Figure S14.**  $^{13}C$  NMR (CHCl<sub>3</sub>, 125 MHz) of **16b**.

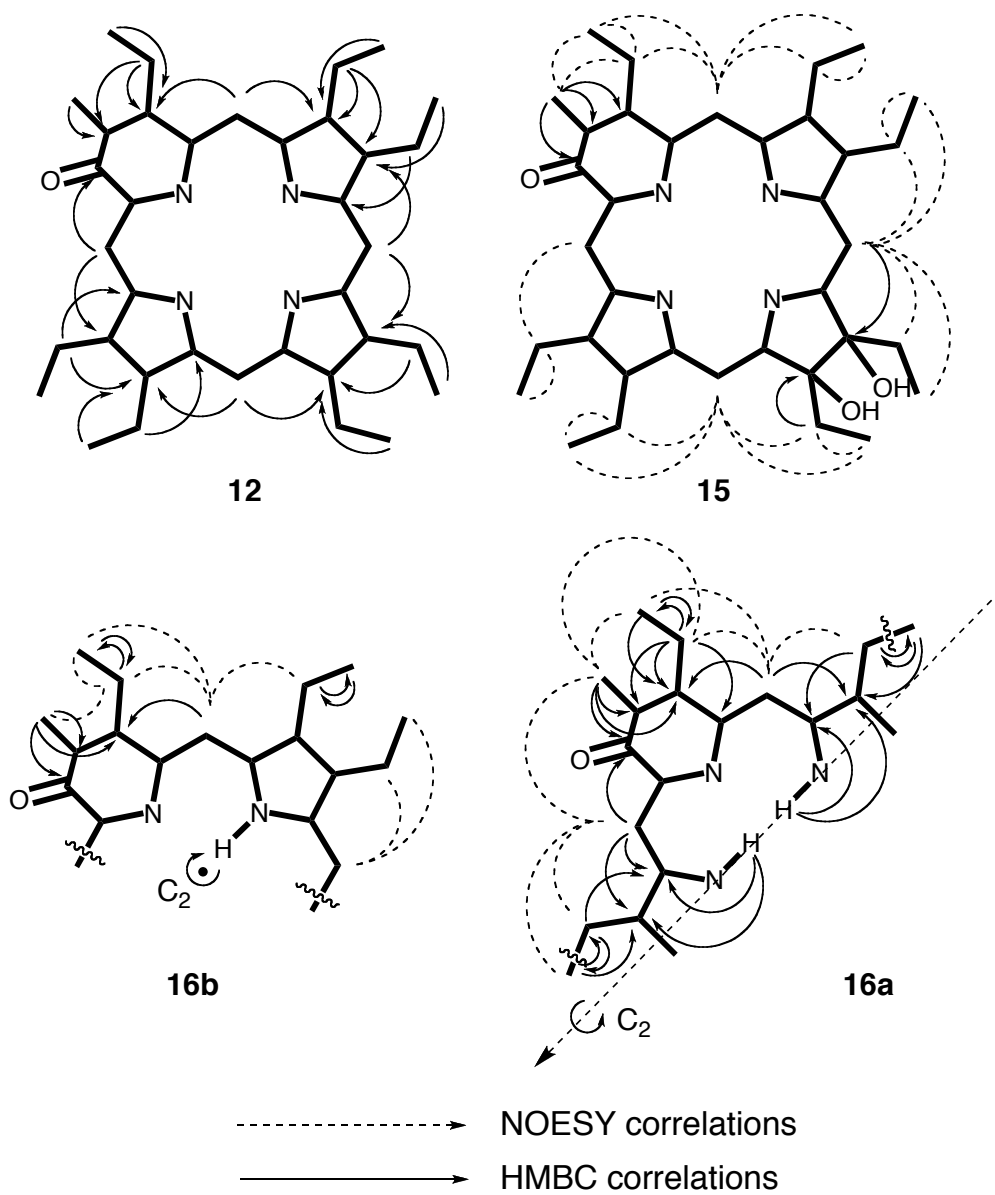

**Figure S15.** Summary of the HMQC and NOESY correlation data upon which the peak assignments rested. (all  $\text{CHCl}_3$ , 500/125 MHz).



**Tabel S1.** Solvent-dependent UV-vis spectra of **12**

| <b>Solvent</b>                     | $\lambda_{\text{max}}$ (rel. intensity)                                                      |
|------------------------------------|----------------------------------------------------------------------------------------------|
| <b>C<sub>6</sub>H<sub>6</sub></b>  | 403 (0.30), 425 (1.00), 443 (0.33), 545 (0.04), 581 (0.08), 617 (0.05), 677 (0.14)           |
| <b>DMSO</b>                        | 403 (0.23), 426 (1.00), 446 (0.30), 547 (0.04), 578 (sh), 587 (0.08), 615 (0.07), 672 (0.11) |
| <b>C<sub>6</sub>H<sub>11</sub></b> | 379 (0.22), 400 (1.00), 418 (0.47), 435 (0.33), 583 (0.08), 615 (0.09), 667 (0.07)           |

**Tabel S2.** Solvent-dependent UV-vis spectra of **12Zn**

| <b>Solvent</b>                            | $\lambda_{\text{max}}$ (rel. intensity)        |
|-------------------------------------------|------------------------------------------------|
| <b>CHCl<sub>3</sub> (EtOH stabilized)</b> | 434 (1.00), 454 (0.56), 577 (0.06), 627 (0.16) |
| <b>CHCl<sub>3</sub> (HPLC)</b>            | 428 (1.00), 446 (0.96), 633 (0.22)             |
| <b>CHCl<sub>3</sub>/Pentane (3:1)</b>     | 428 (1.00), 446 (0.97), 633 (0.23)             |
| <b>CHCl<sub>3</sub>/Pentane (1:1)</b>     | 427 (0.90), 445 (1.00), 633 (0.24)             |
| <b>CHCl<sub>3</sub>/Pentane (1:3)</b>     | 428 (0.84), 445 (1.00), 633 (0.27)             |
| <b>Pentane</b>                            | 428 (sh), 444 (1.00), 633 (0.26)               |

**Tabel S3.** Solvent-dependent UV-vis spectra of **15**

| <b>Solvent</b>                     | $\lambda_{\text{max}}$ (rel. intensity)                                                      |
|------------------------------------|----------------------------------------------------------------------------------------------|
| <b>CHCl<sub>3</sub></b>            | 402 (0.27), 426 (1.00), 449 (0.29), 541 (0.04), 575 (sh), 587 (0.08), 613 (0.07), 669 (0.10) |
| <b>C<sub>6</sub>H<sub>6</sub></b>  | 403 (0.30), 425 (1.00), 443 (0.33), 545 (0.04), 581 (0.08), 617 (0.05), 677 (0.14)           |
| <b>DMSO</b>                        | 403 (0.23), 426 (1.00), 446 (0.30), 547 (0.04), 578 (sh), 587 (0.08), 615 (0.07), 672 (0.11) |
| <b>C<sub>6</sub>H<sub>12</sub></b> | 379 (0.22), 400 (1.00), 418 (0.47), 4435 (0.33), 583 (0.08), 615 (0.09), 667 (0.07)          |

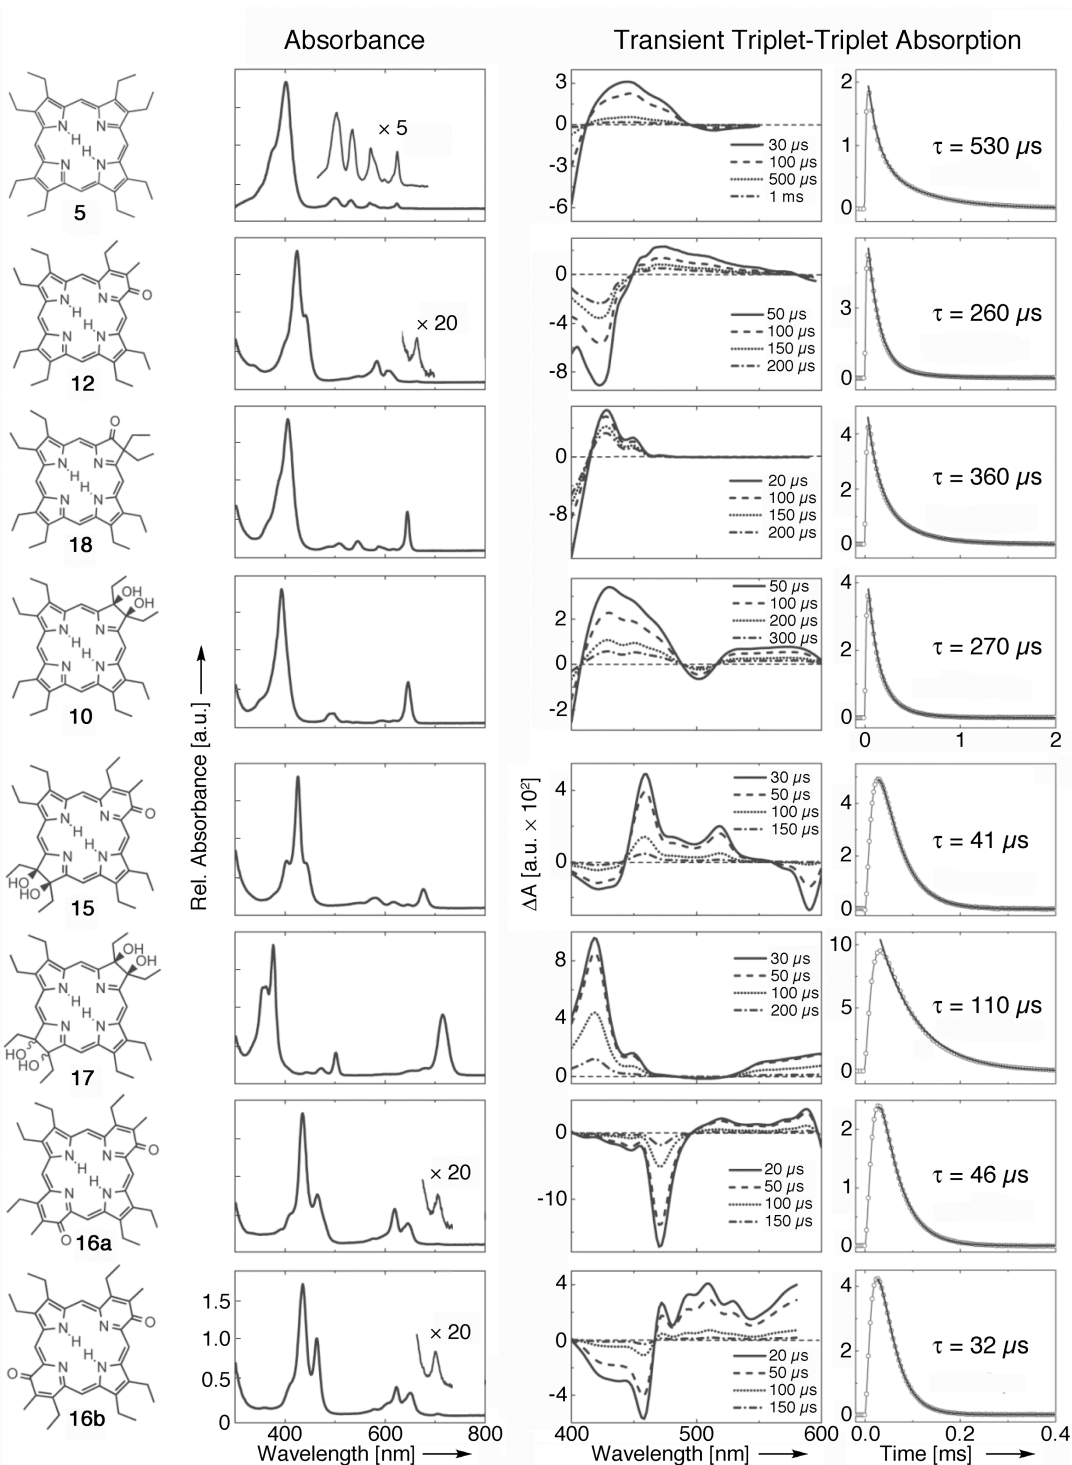

**Figure S16:** Normalized absorption and fluorescence emission spectra and triplet life-times of **5**, **12**, **18**, **10**, **15**, **17**, **16a**, and **16b** (all at ambient T, degassed toluene), together with their transient triplet-triplet transient spectra and the kinetic traces used for the triplet lifetime determination (solid line represents the fitted trace). The triplet excited state lifetimes were calculated as mean of at least eight decay constants of the decay kinetics taken at different wavelengths (440 nm for **5**, 470 nm for **12**, 470 nm for **18**, 430 nm for **10**, 460 nm for **15**, 420 nm for **17**, 520 nm for **16a** and 510 nm for **16b**). For the lifetimes in different solvent systems, see Table S4.

**Table S4.** Triplet Relaxation Time ( $\tau$ ) in toluene and 2-MeTHF.

| <b>Molecule</b> | <b>Solvent</b> | <b><math>\tau</math> [ms]</b> |
|-----------------|----------------|-------------------------------|
| <b>5</b>        | Toluene        | $530 \pm 25$                  |
|                 | 2-MeTHF        | $530 \pm 30$                  |
| <b>12</b>       | Toluene        | $260 \pm 40$                  |
| <b>10</b>       | Toluene        | $270 \pm 40$                  |
|                 | 2-MeTHF        | $350 \pm 10$                  |
| <b>18</b>       | Toluene        | $360 \pm 20$                  |
|                 | 2-MeTHF        | $650 \pm 20$                  |
| <b>15</b>       | Toluene        | $41 \pm 7$                    |
|                 | 2-MeTHF        | $100 \pm 5$                   |
| <b>17</b>       | Toluene        | $110 \pm 10$                  |
|                 | 2-MeTHF        | $120 \pm 10$                  |
| <b>16a</b>      | Toluene        | $46 \pm 4$                    |
| <b>16b</b>      | Toluene        | $32 \pm 2$                    |

**Spectrophotometric Titrations** (Only the Q-band region is shown):

*Conditions:* Porphyrin indicated in  $\text{CH}_2\text{Cl}_2$  (spectrograde) at ambient temperature. Aliquots (10-100  $\mu\text{L}$ ) of a of TFA solution in  $\text{CH}_2\text{Cl}_2$  were added until no further significant changes in the spectrum were observed. Concentration of acid (2% to 0.02%) and volume of porphyrin solution (3 to 10 mL) were chosen such that the dilution error at the point of highest [TFA] did not exceed 5%.

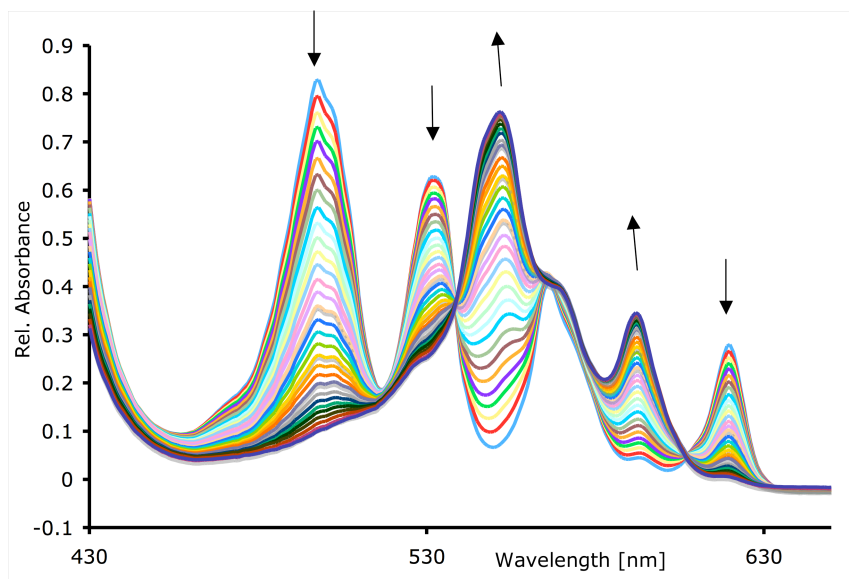

**Figure S17:** UV-vis Spectrophotometric titration of **OEP (5)** (Q-band region).

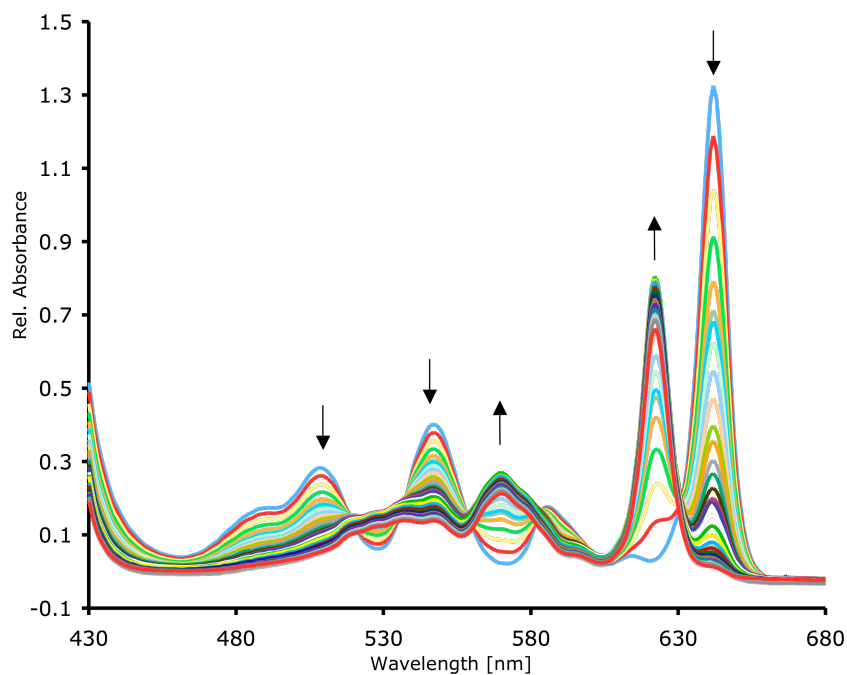

**Figure S18:** UV-vis Spectrophotometric titration of oxochlorin **18** (Q-band region).

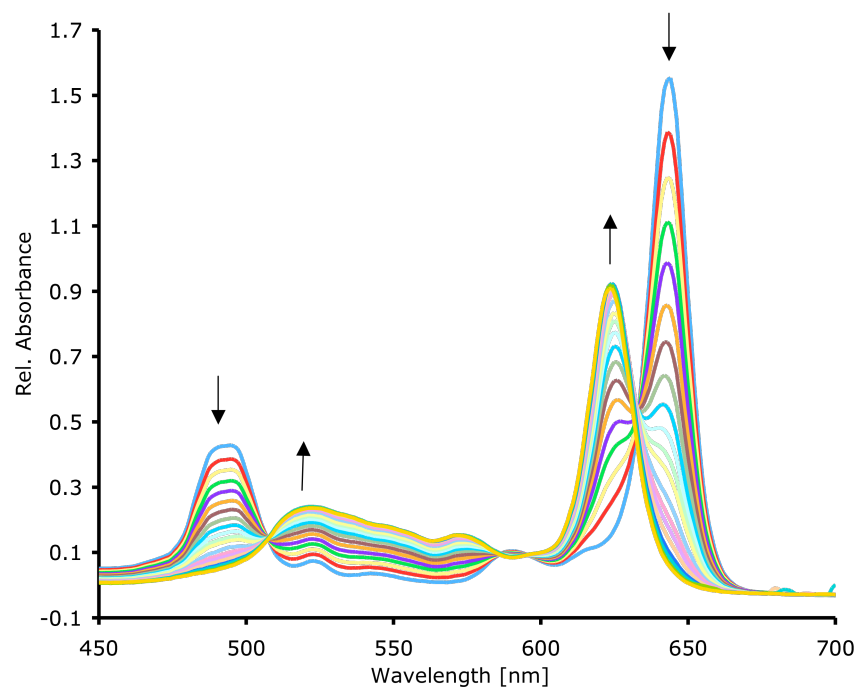

**Figure S19:** UV-vis Spectrophotometric titration of diol chlorin **10** (Q-band region).

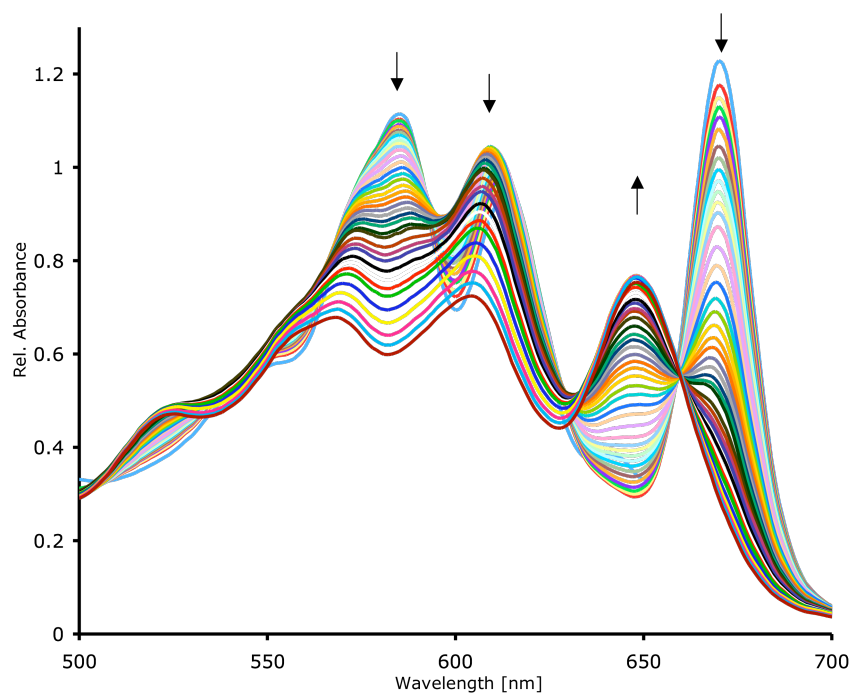

**Figure S20:** UV-vis Spectrophotometric titration of 12,13-dihydro,dihydroxyoxypyriporphyrin **15** (Q-band region).

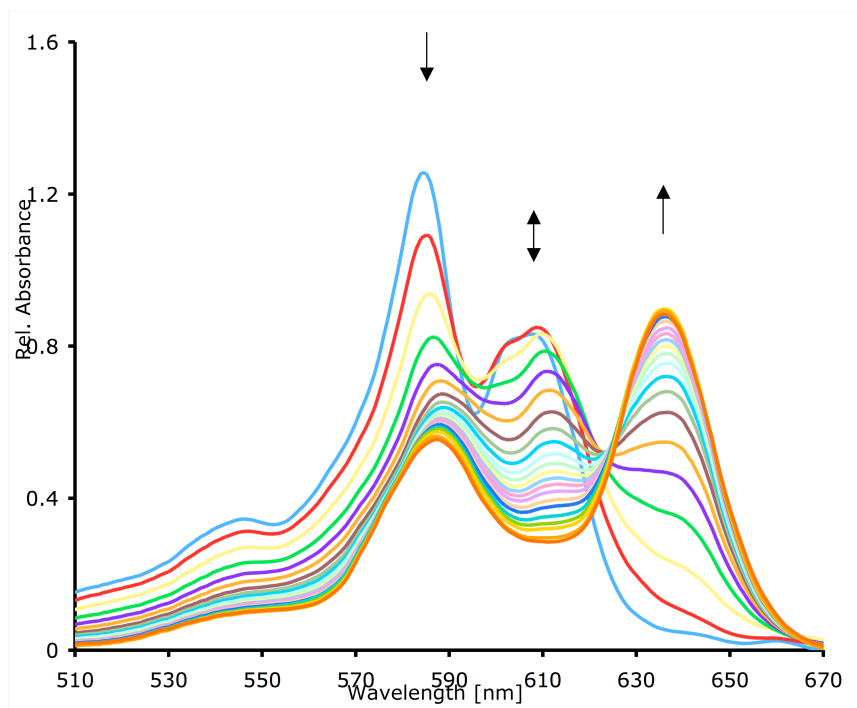

**Figure S21:** UV-vis Spectrophotometric titration of oxypyriporphyrin **12** (Q-band region).

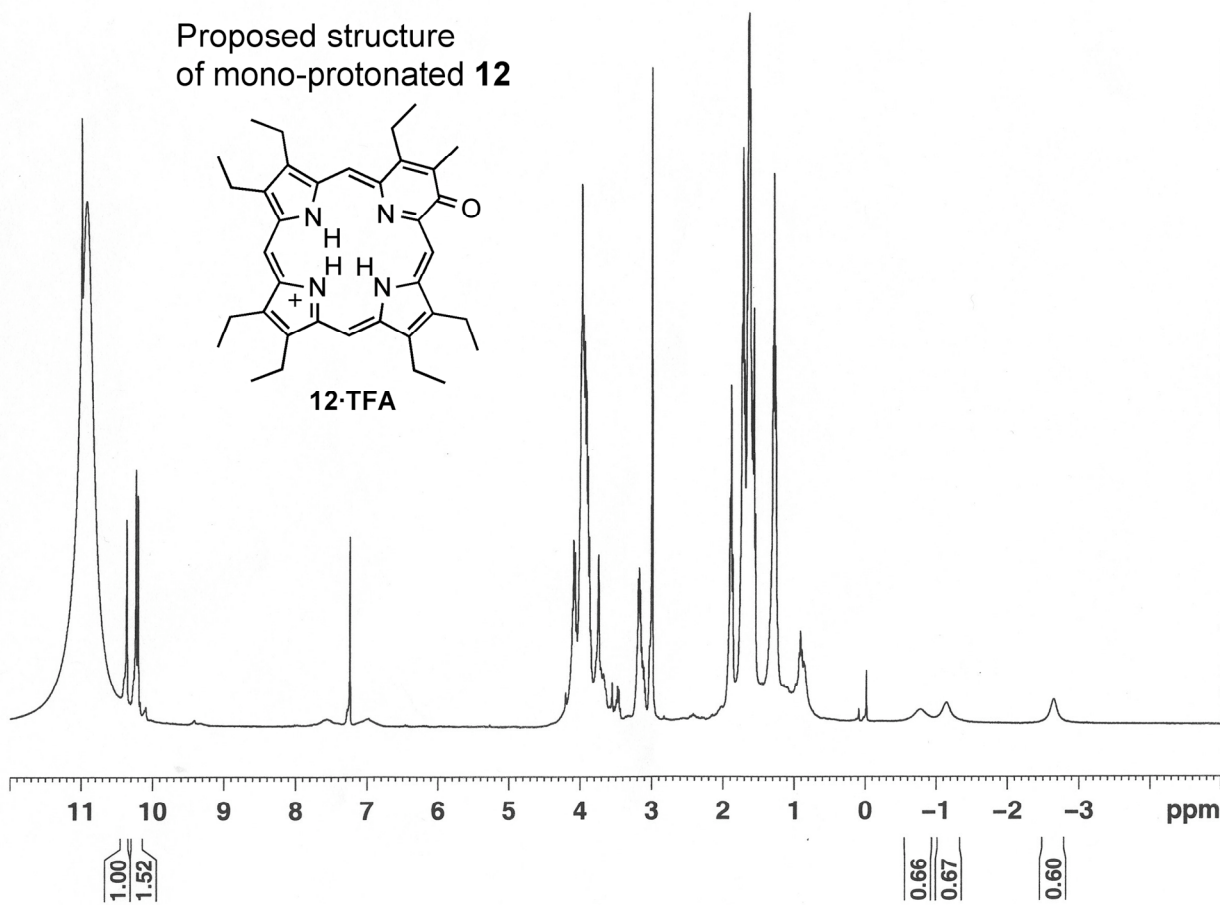

**Figure S22:**  $^1\text{H}$  NMR of **12** ( $\text{CDCl}_3$  + traces TFA, 400 MHz).

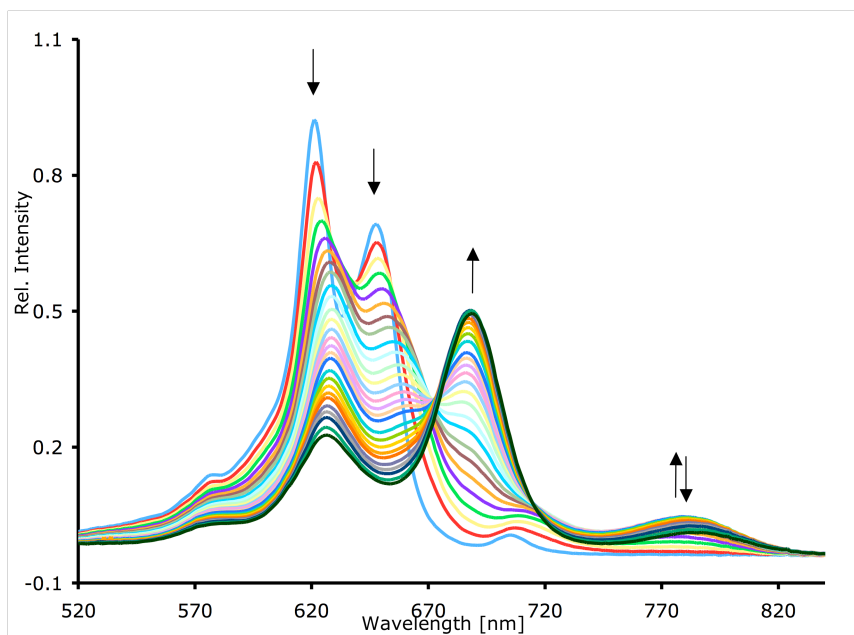

**Figure S23:** UV-vis Spectrophotometric titration of bis(oxypyri) porphyrin **16a** (Q-band region).

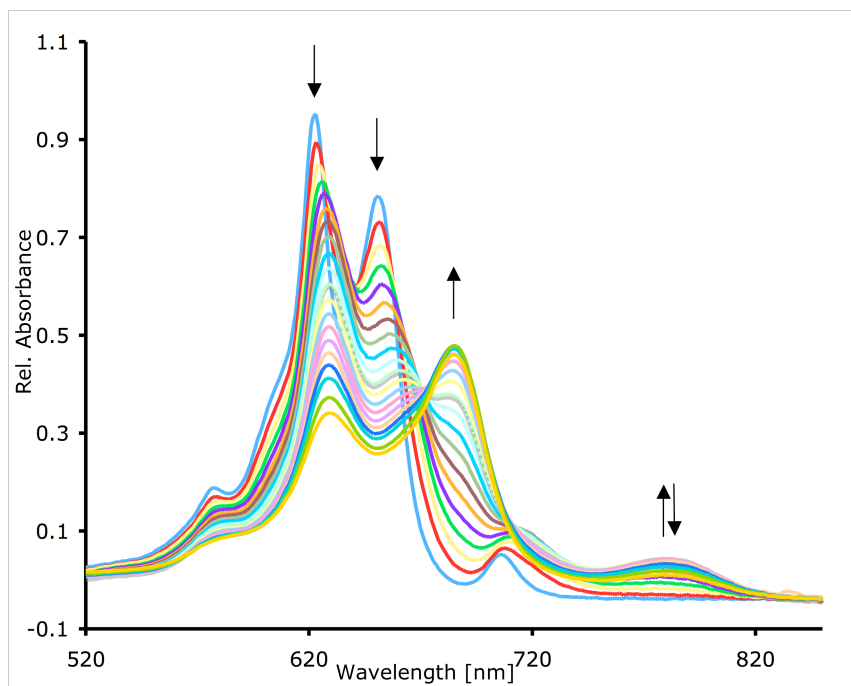

**Figure S24:** UV-vis Spectrophotometric titration of bis(oxypyri) porphyrin **16b** (Q-band region).

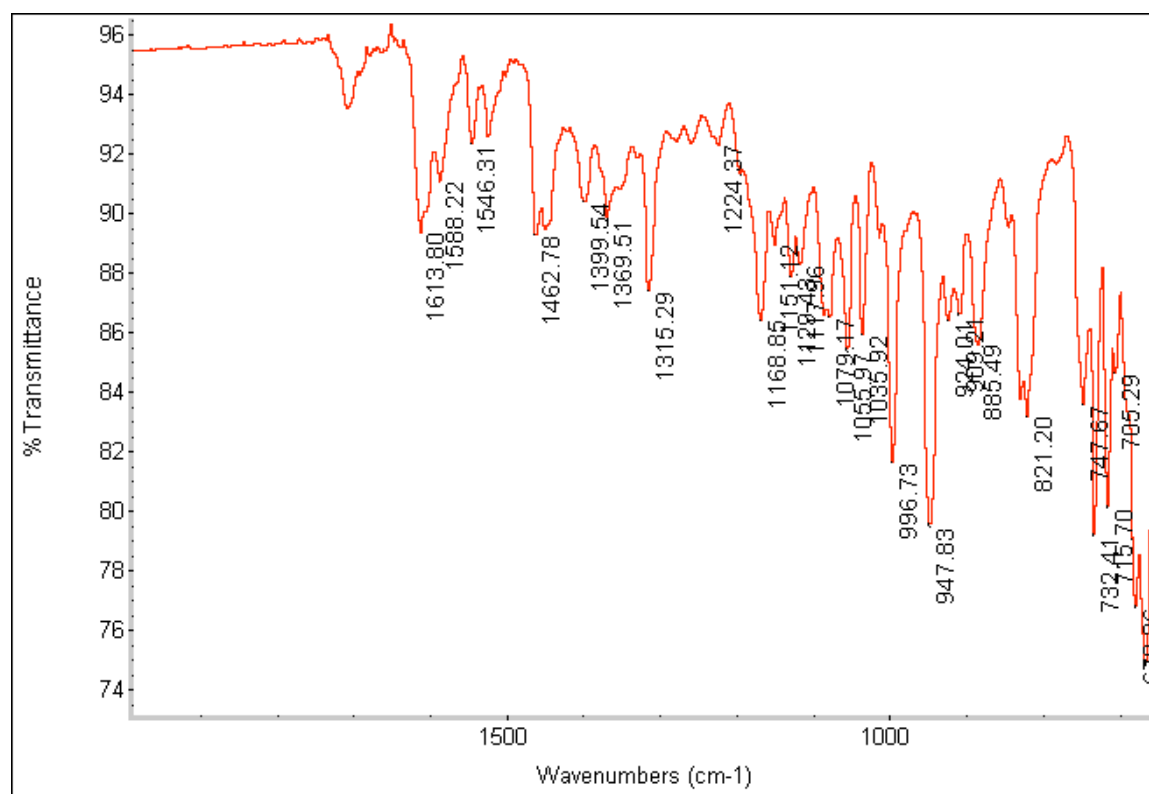

**Figure S25:** FT-IR Spectra (diffuse reflectance, neat sample) of **10** (for comparison)

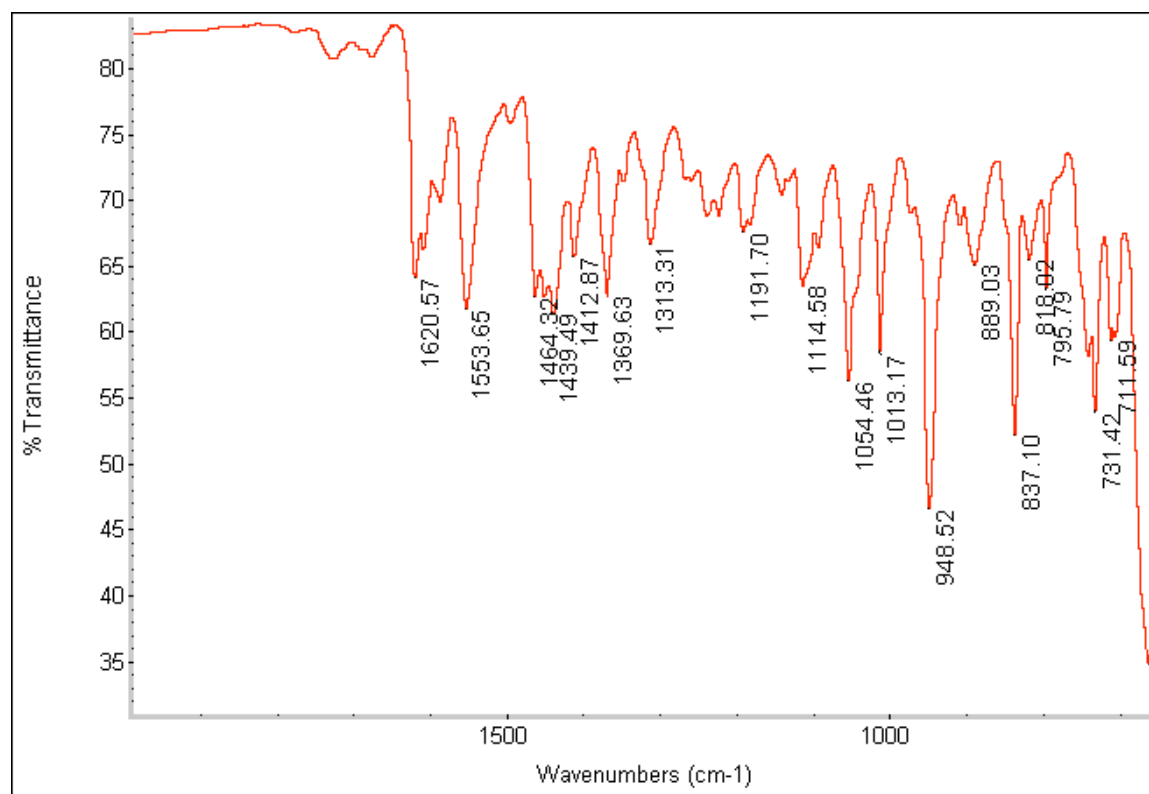

**Figure S26:** FT-IR Spectra (diffuse reflectance, neat sample) of **12**



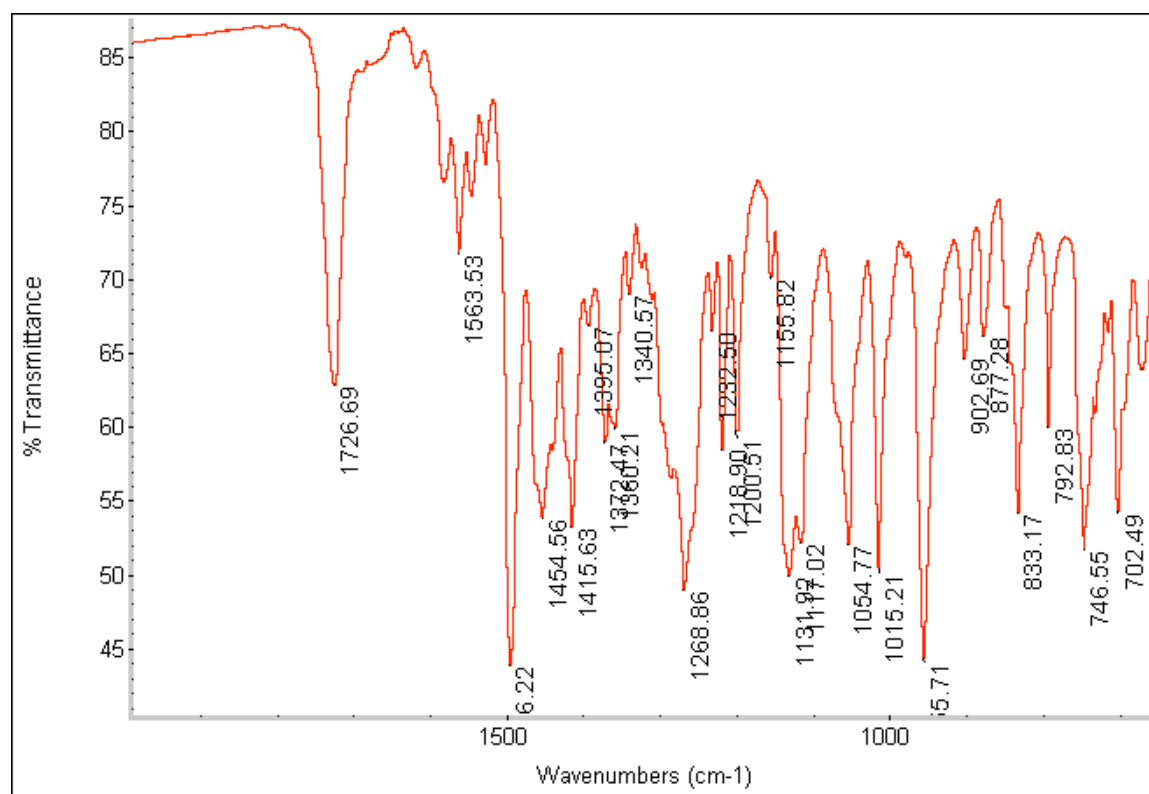

**Figure S27:** FT-IR Spectra (diffuse reflectance, neat sample) of **12Zn**

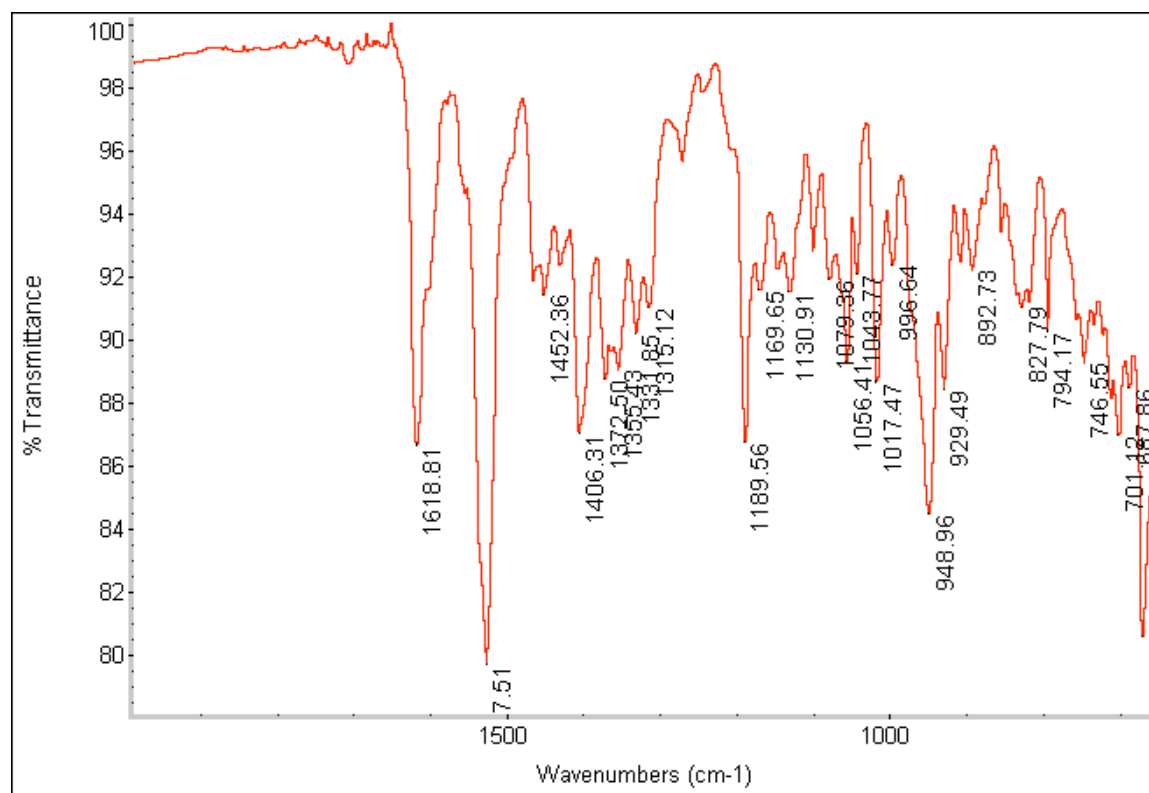

**Figure S28:** FT-IR Spectra (diffuse reflectance, neat sample) of **15**

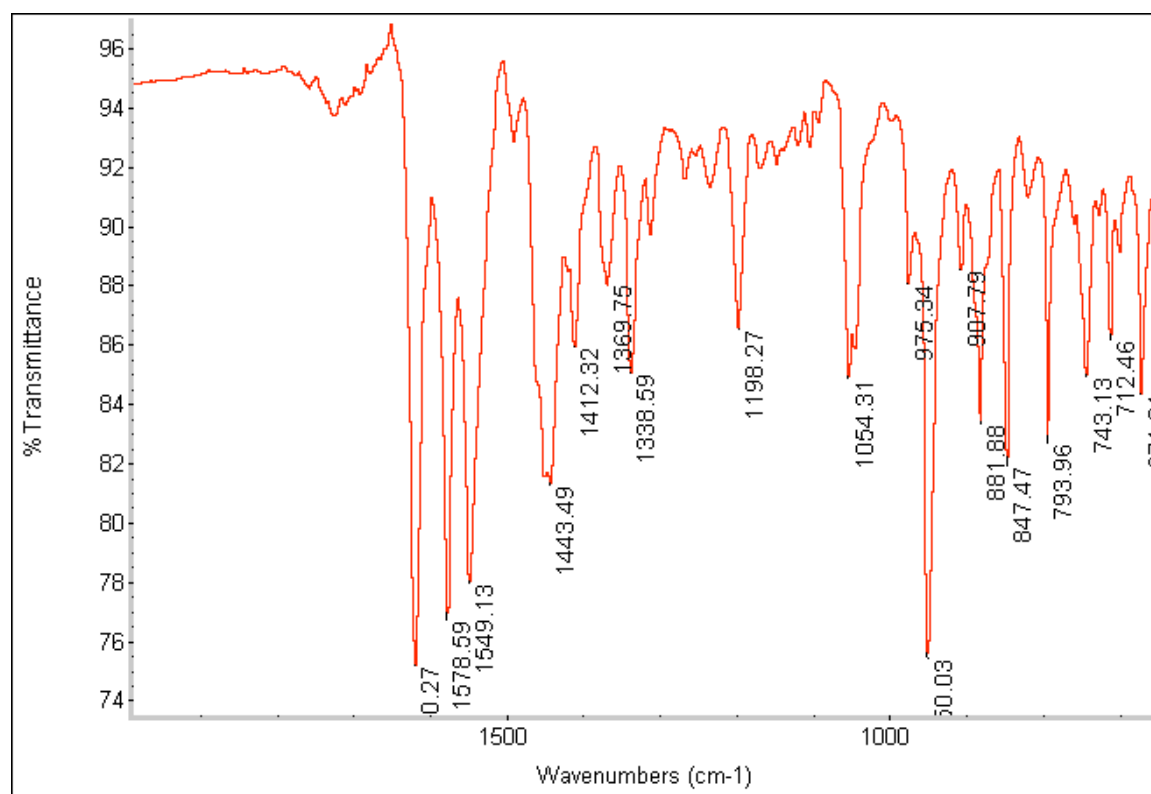

**Figure S29:** FT-IR Spectra (diffuse reflectance, neat sample) of **16a**

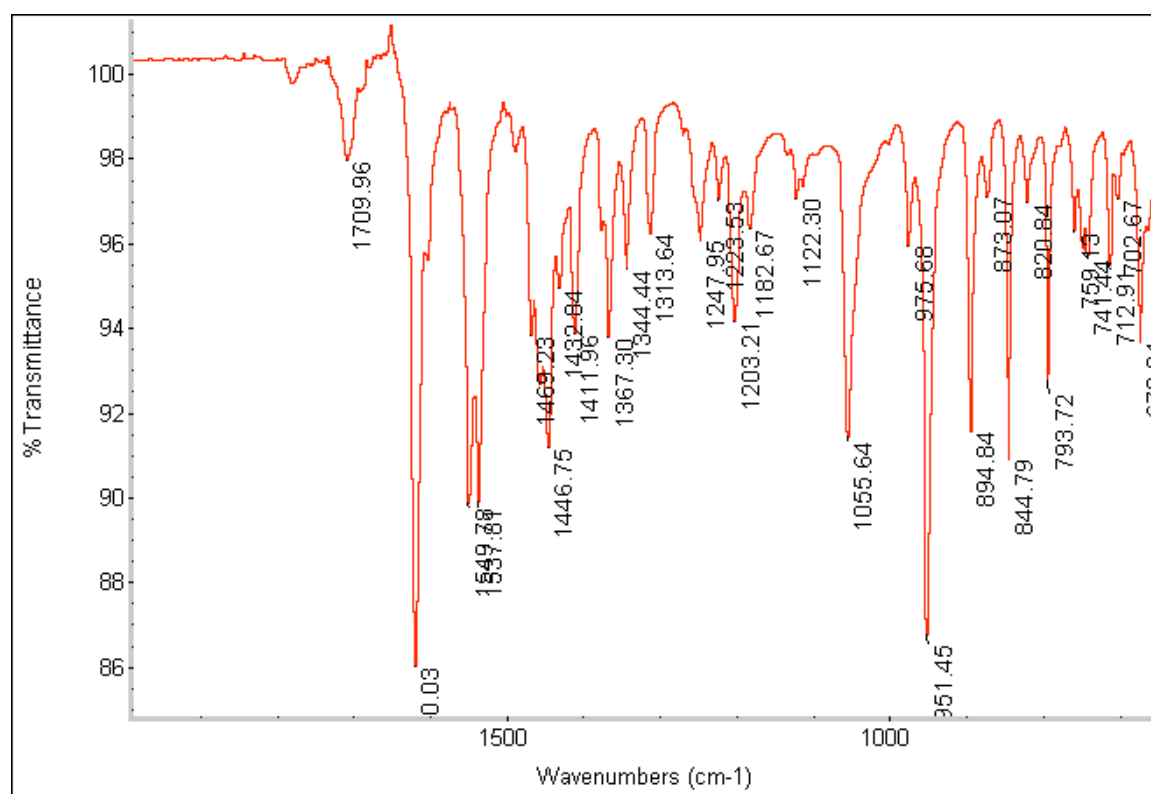

**Figure S30:** FT-IR Spectra (diffuse reflectance, neat sample) of **16b**

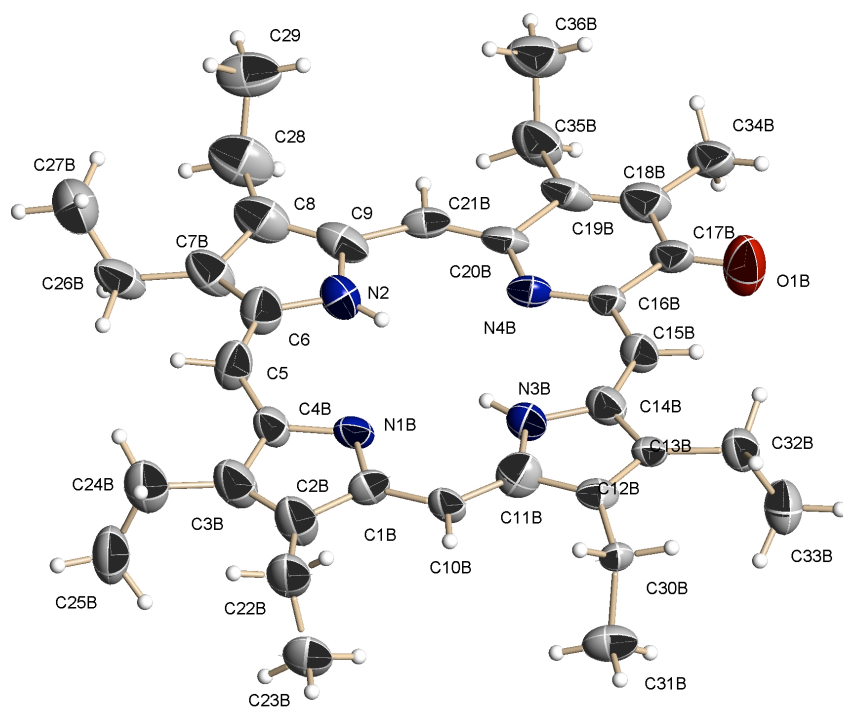

**Figure S31:** ORTEP (30% occupancy) representation of the structure of **12** with numbering system used in the structural analysis (note that this numbering differs from the numbering used in the NMR analyses).

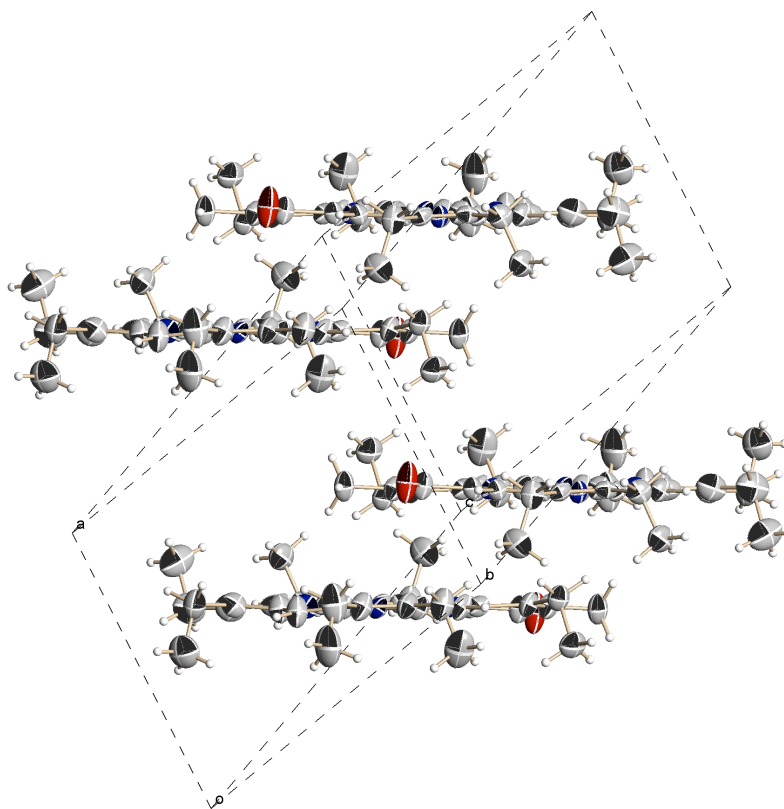

**Figure S32:** Packing diagram for **12**.
